# Supplementary material for: Branched DNA-Based Electrochemical Biosensor for Sensitive Nucleic Acids Analysis with Gold Nanoparticles as Amplifier
Source: MDPI journal article supplement (doi:10.3390/ijms241612565), 2023-08-08
Supplement: s1 [file s1]

**Branched DNA-based electrochemical biosensor for sensitive nucleic acids analysis with gold nanoparticles as amplifier**

Zhikun Zhang<sup>\*</sup>, Chunyan Shang, Cuixia Hu, Yumin Liu, Jilong Han<sup>\*</sup>

School of Chemical and Pharmaceutical Engineering, Hebei University of Science and Technology,  
Shijiazhuang, 050018, China

<sup>\*</sup>Corresponding author E-mail address. zhikun.zhang@hebust.edu.cn and hanjilong@hebust.edu.cn

**Table S1.** Oligonucleotide sequences were employed to synthesize branched DNA or participate in hybridization chain reaction.

| Strand              | Sequence (5'-3')                                  | Use                 |
|---------------------|---------------------------------------------------|---------------------|
| T-DNA               | CGACATGTCATAGCTTATCAGACTGATGTTGACGATTCTCTA        | Target DNA          |
| a <sub>1</sub> -DNA | GAAGCTGCCAGTACCAATCCTGTCGCACAAAAAAAAAAAAA-SH      | Y <sub>1</sub> -DNA |
| b <sub>1</sub> -DNA | GGAGACTAGATCATGTACTGGCAGCTTCTAGAGAATCGTCAACATCAGT |                     |
| c <sub>1</sub> -DNA | GTGCGACAGGATTGATGATCTAGTCTCCTAGAGAATCGTCAACATCAGT | Probe               |
| a <sub>2</sub> -DNA | SH-AAAAAAAAAAAAACACGCTGTCCTAACCATGACCGTCGAAG      | Amplifier           |
| b <sub>2</sub> -DNA | CTGATAAGCTATGACATGTCGCTTCGACGGTCATGTACTAGATCAGAGG | Y <sub>2</sub> -DNA |
| c <sub>3</sub> -DNA | CTGATAAGCTATGACATGTCGCCTCTGATCTAGTAGTTAGGACAGCGTG |                     |

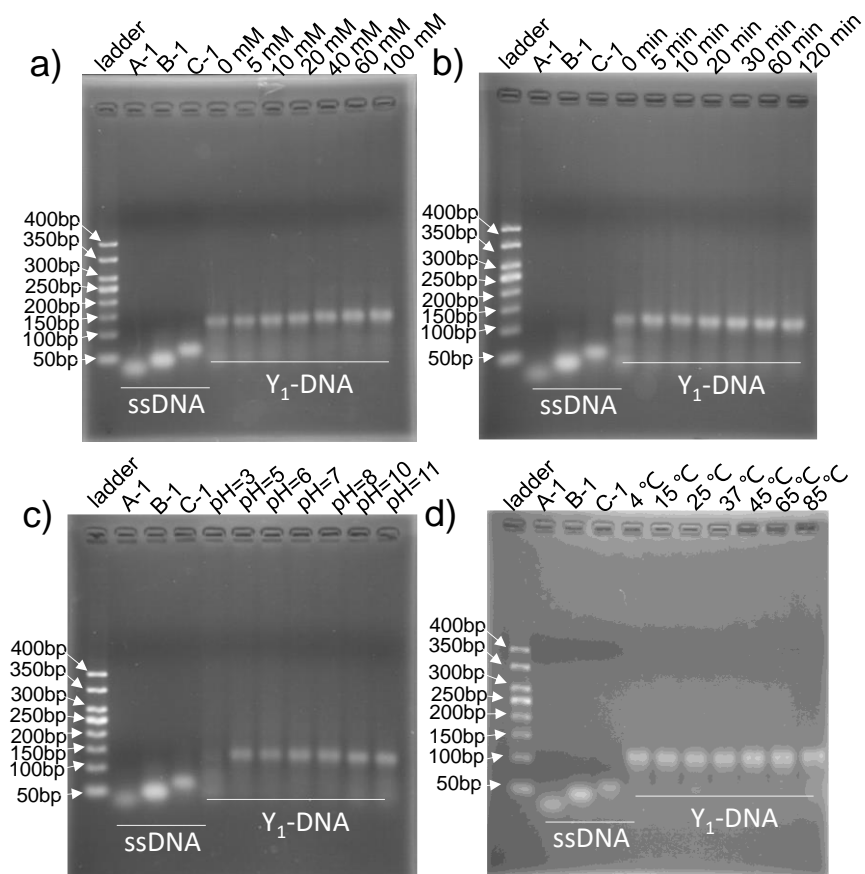

**Figure S1.** Gel electrophoresis analysis (3%) of Y<sub>1</sub>-DNA prepared under different conditions. The Y<sub>1</sub>-DNA was prepared in presence of various NaCl concentrations (a), incubation time (b), pH (c) and temperature (d).

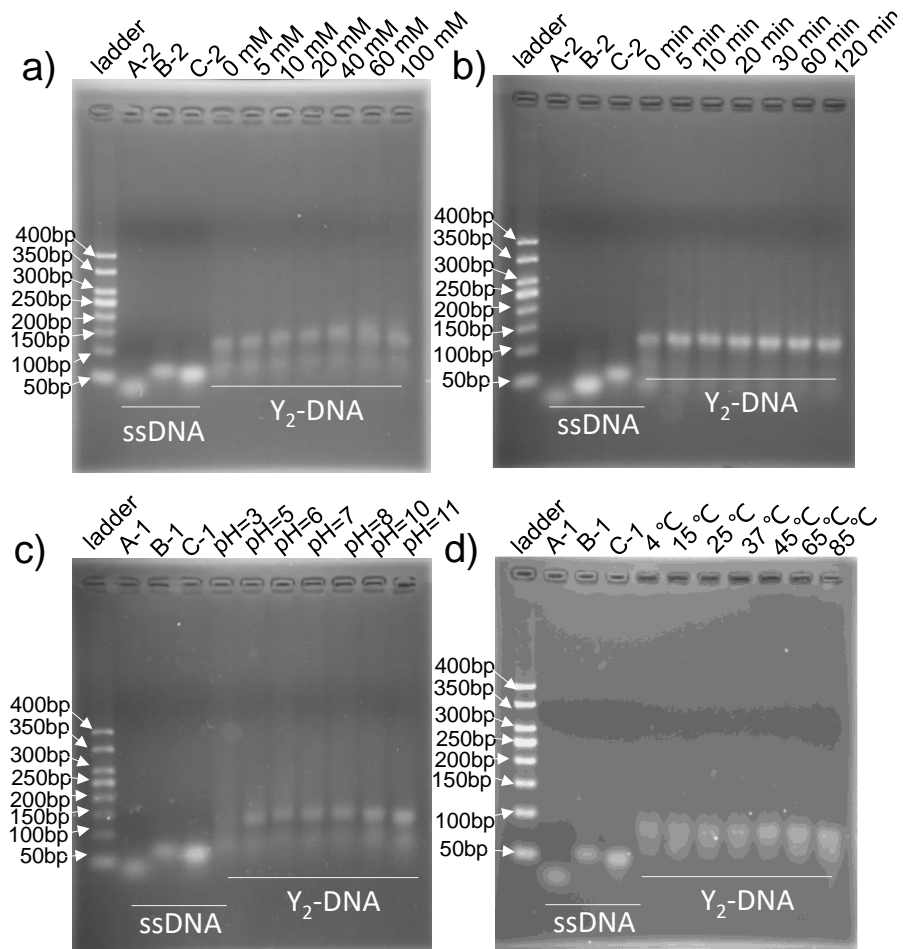

**Figure S2.** Gel electrophoresis analysis (3%) of  $Y_2$ -DNA prepared under different conditions. The  $Y_2$ -DNA was prepared in presence of various NaCl concentrations (a), incubation time (b), pH (c) and temperature (d).
